# Supplementary material for: Timely Activation of Budding Yeast APCCdh1 Involves Degradation of Its Inhibitor, Acm1, by an Unconventional Proteolytic Mechanism
Source: PubMed Central journal article supplement (PMC4114781; doi:10.1371/journal.pone.0103517), 2014-07-29
Supplement: pone.0103517.s001.pdf [file pone.0103517.s001.pdf]

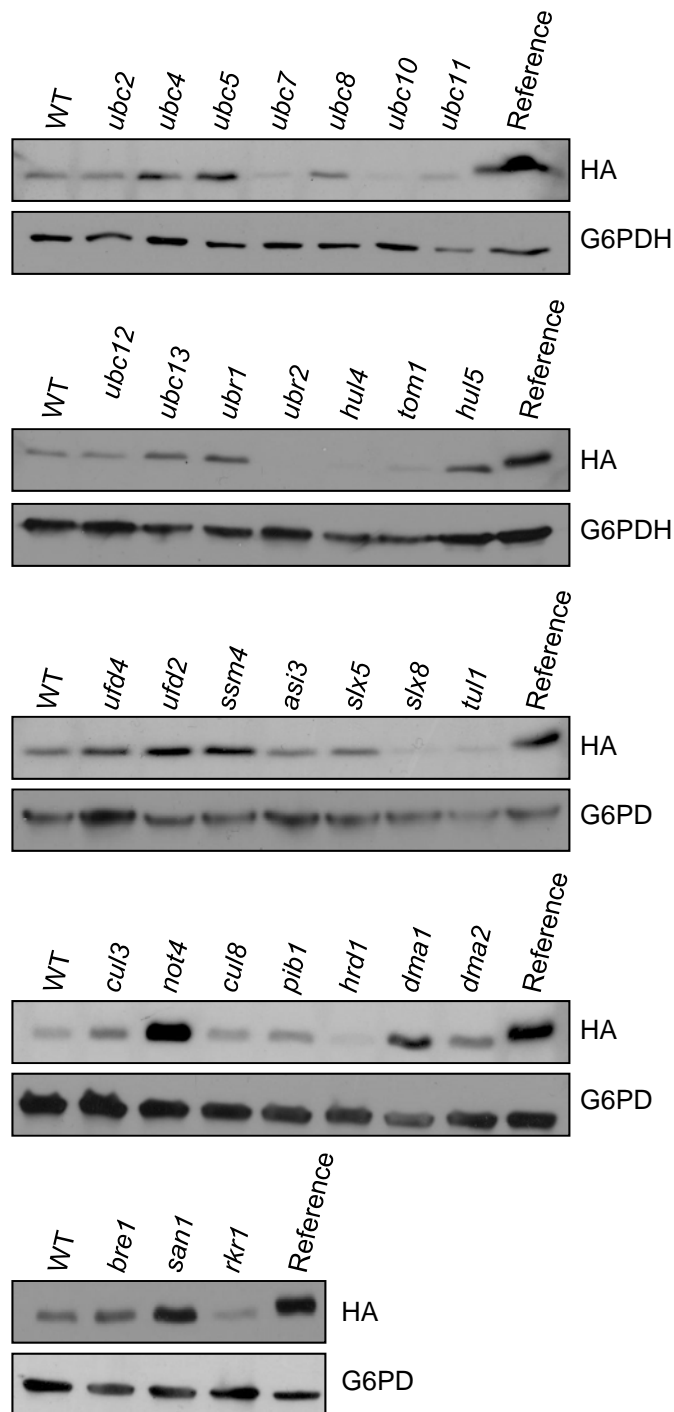

**Figure S1. Screening of non-essential E2 conjugases and E3 ligases for effects on 3HA-Acm1<sup>5A</sup> expression level.** 3HA-Acm1<sup>5A</sup> was expressed from the natural *ACM1* promoter on a centromeric plasmid in BY4741 (WT) and deletion strains lacking the genes indicated above each lane. The steady state level of 3HA-Acm1<sup>5A</sup> in asynchronous log phase cultures of each strain was compared to that of wild-type 3HA-Acm1 (labeled “Reference”) expressed from the same plasmid in BY4741 by immunoblotting with anti-HA antibody. G6PDH is a loading control.
