# Supplementary material for: Timely Activation of Budding Yeast APCCdh1 Involves Degradation of Its Inhibitor, Acm1, by an Unconventional Proteolytic Mechanism
Source: PubMed Central journal article supplement (PMC4114781; doi:10.1371/journal.pone.0103517), 2014-07-29
Supplement: pone.0103517.s002.pdf [file pone.0103517.s002.pdf]

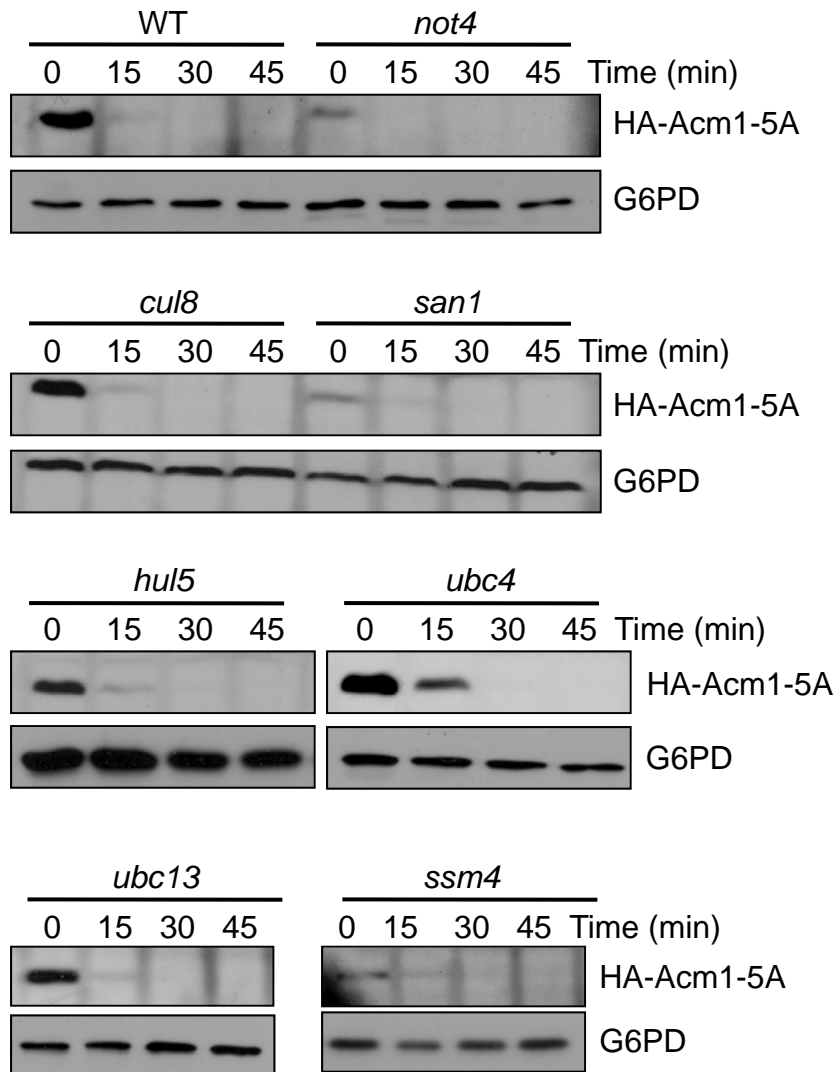

**Figure S2. Measurements of HA-Acm1<sup>5A</sup> stability in selected strains lacking non-essential E2 conjugases and E3 ligases.** Stability of HA-Acm1<sup>5A</sup> was monitored by *GAL1* promoter stability assay as described in Materials and Methods in asynchronous mid-log phase cultures of the indicated gene deletion strains harboring pHLP110. Anti-HA immunoblot profiles were compared to those from MG-132 treated cells and conditional proteasome mutant strains (not shown, see Figure 2).
