# Supplementary material for: Timely Activation of Budding Yeast APCCdh1 Involves Degradation of Its Inhibitor, Acm1, by an Unconventional Proteolytic Mechanism
Source: PubMed Central journal article supplement (PMC4114781; doi:10.1371/journal.pone.0103517), 2014-07-29
Supplement: pone.0103517.s003.pdf [file pone.0103517.s003.pdf]

**A**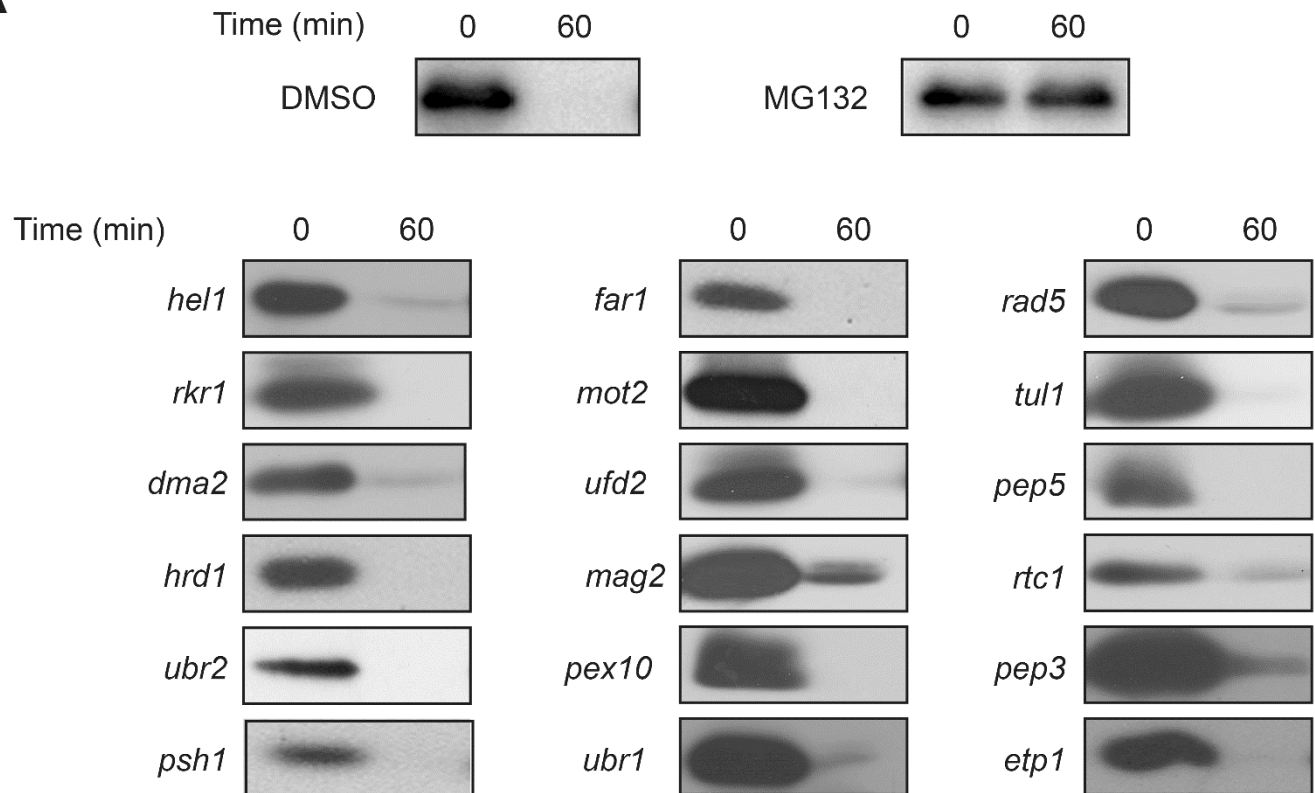**B**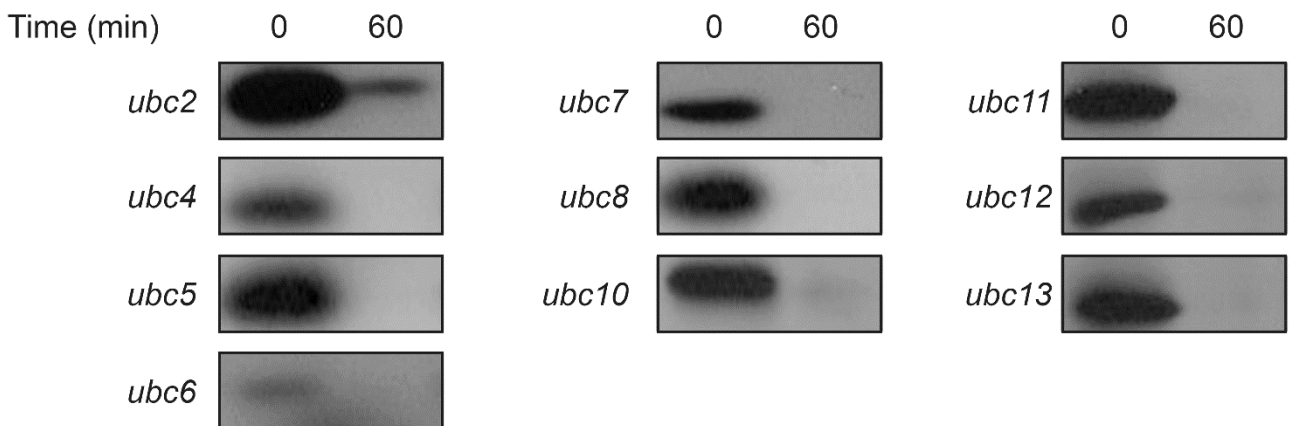

**Figure S3. Screening of non-essential E2 conjugases and known and putative E3 ligases for effects on AcM1<sup>5A</sup> stability.** Experiments performed as in Figure S2 but using an untagged AcM1<sup>5A</sup> variant expressed from  $P_{GAL1}$  in pHLP392 in an *acm1* $\Delta$  background. Only timepoints 0 and 60 minutes following glucose and cycloheximide addition were compared. MG-132 treatment was used as a positive control for AcM1 stabilization. Anti-AcM1 antibody was used to detect the AcM1<sup>5A</sup>. Only representative E3 deletion strains are shown in panel A, but all strains listed in Table S1 were analyzed with similar results.
