# Supplementary material for: Timely Activation of Budding Yeast APCCdh1 Involves Degradation of Its Inhibitor, Acm1, by an Unconventional Proteolytic Mechanism
Source: PubMed Central journal article supplement (PMC4114781; doi:10.1371/journal.pone.0103517), 2014-07-29
Supplement: pone.0103517.s005.pdf [file pone.0103517.s005.pdf]

1 **Table S1. Yeast deletion strains screened for effects on Acm1 stabilization.**

| Non-essential E3s        |                    | Non-essential E2s   | Essential E3s |
|--------------------------|--------------------|---------------------|---------------|
| <i>ASI3</i>              | <i>PEX12</i>       | <b><i>UBC2</i></b>  | <i>RSP5</i>   |
| <i>ASR1</i>              | <b><i>PIB1</i></b> | <b><i>UBC4</i></b>  | <i>PRP19</i>  |
| <b><i>BRE1</i></b>       | <i>PSH1</i>        | <b><i>UBC5</i></b>  | <i>SCF*</i>   |
| <b><i>CUL3</i></b>       | <i>RAD5</i>        | <i>UBC6</i>         | <i>APC*</i>   |
| <b><i>CUL8</i></b>       | <i>RAD16</i>       | <b><i>UBC7</i></b>  |               |
| <b><i>DMA1</i></b>       | <i>RAD18</i>       | <b><i>UBC8</i></b>  |               |
| <b><i>DMA2</i></b>       | <i>RCO1</i>        | <b><i>UBC10</i></b> |               |
| <i>ETP1</i>              | <b><i>RKR1</i></b> | <b><i>UBC11</i></b> |               |
| <i>FAP1</i>              | <i>RTC1</i>        | <b><i>UBC12</i></b> |               |
| <i>FAR1</i>              | <i>SAN1</i>        | <b><i>UBC13</i></b> |               |
| <i>HEL1</i>              | <b><i>SLX5</i></b> |                     |               |
| <i>HEL2</i>              | <b><i>SLX8</i></b> |                     |               |
| <b><i>HRD1</i></b>       | <i>SNT2</i>        |                     |               |
| <b><i>HUL4</i></b>       | <b><i>SSM4</i></b> |                     |               |
| <b><i>HUL5</i></b>       | <b><i>TOM1</i></b> |                     |               |
| <i>IRC20</i>             | <i>TUL1</i>        |                     |               |
| <i>ITT1</i>              | <b><i>UBR1</i></b> |                     |               |
| <i>MAG2</i>              | <b><i>UBR2</i></b> |                     |               |
| <b><i>MOT2(NOT4)</i></b> | <b><i>UFD2</i></b> |                     |               |
| <i>NFI1</i>              | <b><i>UFD4</i></b> |                     |               |
| <i>PEP3</i>              | <i>ULS1</i>        |                     |               |
| <i>PEP5</i>              | <i>VPS8</i>        |                     |               |
| <i>PEX2</i>              | <i>YBR062C</i>     |                     |               |
| <i>PEX10</i>             |                    |                     |               |

2 For all non-essential genes, deletion strains were obtained from the Open Biosystems gene  
 3 deletion library and crossed to YKA404 to generate combined deletions with  
 4 *acm1Δ::KanMX4*.

5 For essential genes RSP5 and PRP19, tetracycline-repressible strains were obtained from the  
 6 Open Biosystems Tet-promoter collection.

7 \*Effects of SCF on Acm1 stability were tested using conditional *cdc34* and *cdc53* mutant  
 8 strains (not shown and [32]). No effect was found. Lack of dependence on APC can  
 9 be found in Figure 1 and [31].

10 Strains in bold were tested in both Figure S1 and Figure S3 screens. Non-essential E3 and  
 11 E2 strains not in bold were only tested in the Figure S3 screen.

12

13
