# Supplementary material for: Timely Activation of Budding Yeast APCCdh1 Involves Degradation of Its Inhibitor, Acm1, by an Unconventional Proteolytic Mechanism
Source: PubMed Central journal article supplement (PMC4114781; doi:10.1371/journal.pone.0103517), 2014-07-29
Supplement: pone.0103517.s006.pdf [file pone.0103517.s006.pdf]

1 **Table S2. Yeast strains used in this study.**

| Strain           | Genotype                                                                                           | Source             |
|------------------|----------------------------------------------------------------------------------------------------|--------------------|
| BY4741           | MATa <i>his3Δ1 leu2Δ0 met15Δ0 ura3Δ0</i>                                                           | Open Biosystems    |
| W303             | MATa <i>ade2-1 his3-11,15 leu2-3,112 trp1-1 ura3-1 can1-100</i>                                    |                    |
| <i>doa4</i> □    | (BY4741) MATa <i>doa4::KanMX4</i>                                                                  | Open Biosystems    |
| MHY753           | MATa <i>his3-Δ200 leu2D1 ura3-52 lys2-801 trp1-63 ade2-101</i>                                     | [19]               |
| MHY754           | MATa <i>his3-Δ200 leu2D1 ura3-52 lys2-801 trp1-63 ade2-101 cim3-1</i>                              | [19]               |
| YKA247           | (W303) <i>bar1::URA3 acm1::KanMX4</i>                                                              | [11]               |
| YKA404           | MATα <i>acm1::Nat1 can1::STE2pr-his5 lyp1Δ his3Δ1 leu2Δ0 ura3Δ0 met15Δ0</i>                        | This study         |
| YKA407           | (BY4741) MATa <i>bar1::hisG acm1::KanMX4 pdr5::URA3</i>                                            | [15]               |
| YWO0607          | MATa <i>ura3 leu2-3,112 his3-11,15 Can<sup>S</sup> Gal+</i>                                        | Dieter H. Wolf     |
| YWO0612          | MATa <i>ura3 leu2-3,112 his3-11,15 Can<sup>S</sup> Gal+ pre1-1 pre2-2</i>                          | Dieter H. Wolf     |
| YKA468           | MATa <i>ura3Δ leu2Δ ade2Δ his3Δ trp1Δ dbf2-2 CLB5-3HA:TRP1 PDS1-9MYC:HIS3</i>                      | This study         |
| YKA469           | (W303) MATa <i>cdc15-2 GFP-TUB1:URA3 acm1::KanMX4</i>                                              | This study         |
| yBR135           | (W303) MATa <i>pds1::LEU2 clb5::HIS3 trp1-1::SIC1:TRP1<sup>10x</sup></i>                           | [17]               |
| yBR159           | (W303) MATa <i>pds1::LEU2 clb5::HIS3 trp1-1::SIC1:TRP1<sup>10x</sup> apc2Δ apc11Δ cdc20Δ cdh1Δ</i> | [17]               |
| RJD3268          | (W303) MATa <i>uba1::KanMX pRS313-UBA1</i>                                                         | Ray Deshaies       |
| RJD3269          | (W303) MATa <i>uba1::KanMX pRS313-uba1-204</i>                                                     | Ray Deshaies       |
| FM1175           | (W303) MATa <i>P<sub>MET3</sub>-CDC20-HA::TRP1</i>                                                 | Foong May<br>Yeong |
| YKA859           | (FM1175) <i>acm1::KanMX4 KIP1-6HA:NatNT2</i>                                                       | This study         |
| <i>sic1Δ</i>     | (BY4741) MATa <i>sic1::KanMX4</i>                                                                  | Open Biosystems    |
| <i>cdh1Δ</i>     | (BY4741) MATa <i>cdh1::KanMX4</i>                                                                  | Open Biosystems    |
| <i>RPN11-TAP</i> | (BY4741) MATa <i>RPN11-TAP:HIS3MX</i>                                                              | Open Biosystems    |
| SDL135           | MATa <i>lys2-801 leu2-3,112 ura3-52 his3-Δ200 trp1-1 pre1::PRE1-TEVProA:HIS3</i>                   | Daniel Finley      |
