# Supplementary material for: Timely Activation of Budding Yeast APCCdh1 Involves Degradation of Its Inhibitor, Acm1, by an Unconventional Proteolytic Mechanism
Source: PubMed Central journal article supplement (PMC4114781; doi:10.1371/journal.pone.0103517), 2014-07-29
Supplement: pone.0103517.s007.pdf [file pone.0103517.s007.pdf]

1 **Table S3. Yeast plasmids used in this study.**

| Name         | Expressed Protein            | Backbone | Marker      | Origin    | Promoter    | Source     |
|--------------|------------------------------|----------|-------------|-----------|-------------|------------|
| LHP306       | Ub-K7R                       | YEp352   | <i>URA3</i> | 2 $\mu$ m | <i>CUP1</i> | [22]       |
| LHP308       | Ubiquitin                    | YEp352   | <i>URA3</i> | 2 $\mu$ m | <i>CUP1</i> | [22]       |
| pESCTrp-Fin1 | Fin1-Myc                     | pESC-Trp | <i>TRP1</i> | 2 $\mu$ m | <i>GAL1</i> | [15]       |
| pHLP110      | HA-Acm1 <sup>5A</sup>        | p415GAL1 | <i>LEU2</i> | CEN/ARS   | <i>GAL1</i> | [15]       |
| pHLP117      | 3HA-Acm1                     | p415ADH  | <i>LEU2</i> | CEN/ARS   | <i>ACM1</i> | [11]       |
| pHLP123      | HA-Acm1 <sup>ken</sup>       | p415GAL1 | <i>LEU2</i> | CEN/ARS   | <i>GAL1</i> | [23]       |
| pHLP209      | 3HA-Acm1 <sup>5A</sup>       | p415ADH  | <i>LEU2</i> | CEN/ARS   | <i>ACM1</i> | [15]       |
| pHLP212      | 3HA-Acm1                     | p415GAL1 | <i>LEU2</i> | CEN/ARS   | <i>GAL1</i> | [15]       |
| pHLP231      | 3FLAG-Cdh1                   | pNC219   | <i>TRP1</i> | CEN/ARS   | <i>GAL1</i> | [15]       |
| pHLP298      | 3HA-Acm1 <sup>5A</sup>       | p415GAL1 | <i>LEU2</i> | CEN/ARS   | <i>GAL1</i> | This study |
| pHLP309      | Cib2                         | P415GALL | <i>LEU2</i> | CEN/ARS   | <i>GALL</i> | This study |
| pHLP317      | Fin1-3HA                     | pESC-Leu | <i>LEU2</i> | 2 $\mu$ m | <i>GAL1</i> | This study |
| pHLP328      | 3HA-Acm1 <sup>K0</sup>       | p415ADH  | <i>LEU2</i> | CEN/ARS   | <i>ACM1</i> | This study |
| pHLP330      | 3HA-Acm1 <sup>K0</sup>       | p415GAL1 | <i>LEU2</i> | CEN/ARS   | <i>GAL1</i> | This study |
| pHLP391      | Acm1                         | P415GAL1 | <i>LEU2</i> | CEN/ARS   | <i>GAL1</i> | This study |
| pHLP392      | Acm1 <sup>5A</sup>           | p415GAL1 | <i>LEU2</i> | CEN/ARS   | <i>GAL1</i> | This study |
| pHLP397      | Acm1-ProtA                   | p415GAL1 | <i>LEU2</i> | CEN/ARS   | <i>GAL1</i> | This study |
| pHLP399      | Acm1 <sup>NA42</sup> -ProtA  | p415GAL1 | <i>LEU2</i> | CEN/ARS   | <i>GAL1</i> | This study |
| pHLP400      | Acm1 <sup>NA52</sup> -ProtA  | p415GAL1 | <i>LEU2</i> | CEN/ARS   | <i>GAL1</i> | This study |
| pHLP401      | Acm1 <sup>NA60</sup> -ProtA  | p415GAL1 | <i>LEU2</i> | CEN/ARS   | <i>GAL1</i> | This study |
| pHLP402      | Acm1 <sup>NA72</sup> -ProtA  | p415GAL1 | <i>LEU2</i> | CEN/ARS   | <i>GAL1</i> | This study |
| pHLP403      | Acm1 <sup>NA80</sup> -ProtA  | p415GAL1 | <i>LEU2</i> | CEN/ARS   | <i>GAL1</i> | This study |
| pHLP413      | Acm1 <sup>1-18</sup> -ProtA  | p415GAL1 | <i>LEU2</i> | CEN/ARS   | <i>GAL1</i> | This study |
| pHLP414      | Acm1 <sup>13-30</sup> -ProtA | p415GAL1 | <i>LEU2</i> | CEN/ARS   | <i>GAL1</i> | This study |
| pHLP415      | Acm1 <sup>25-42</sup> -ProtA | p415GAL1 | <i>LEU2</i> | CEN/ARS   | <i>GAL1</i> | This study |
| pHLP416      | Acm1 <sup>37-54</sup> -ProtA | p415GAL1 | <i>LEU2</i> | CEN/ARS   | <i>GAL1</i> | This study |
| pHLP417      | Acm1 <sup>49-66</sup> -ProtA | p415GAL1 | <i>LEU2</i> | CEN/ARS   | <i>GAL1</i> | This study |
| pHLP503      | Acm1 <sup>1-52</sup> -ProtA  | p415GAL1 | <i>LEU2</i> | CEN/ARS   | <i>GAL1</i> | This study |
| pHLP504      | Acm1 <sup>12-52</sup> -ProtA | p415GAL1 | <i>LEU2</i> | CEN/ARS   | <i>GAL1</i> | This study |
| pHLP505      | Acm1 <sup>NA52</sup> -ProtA  | p415GAL1 | <i>LEU2</i> | CEN/ARS   | <i>ACM1</i> | This study |
| pHLP361      | Acm1-ProtA                   | p415ADH  | <i>LEU2</i> | CEN/ARS   | <i>ADH1</i> | This study |
| pHLP363      | Acm1 <sup>NA52</sup> -ProtA  | p415ADH  | <i>LEU2</i> | CEN/ARS   | <i>ADH1</i> | This study |
